# Supplementary material for: Painful diabetic neuropathy is associated with accelerated epigenetic aging
Source: GeroScience. 2025 Jan 23;47(3):4041–54. doi: 10.1007/s11357-025-01516-w (PMC12181573; doi:10.1007/s11357-025-01516-w)
Supplement: Supplementary file 11 — Supplementary file11 (XLSX 23 KB) [file 11357_2025_1516_MOESM11_ESM.xlsx]

## Sheet: SupplementaryTableS1
# Article title: Painful diabetic neuropathy is associated with accelerated epigenetic aging
# Journal name: GeroScience
# Author names: Katarzyna M. Kwiatkowska, Paolo Garagnani, Massimiliano Bonafé, Maria Giulia Bacalini, Luciano Calzari, Davide Gentilini, Dan Ziegler, Monique M. Gerrits, Catharina G. Faber, Rayaz A. Malik, Margherita Marchi, Erika Salvi, Giuseppe Lauria# and Chiara Pirazzini
# Corresponding author: Katarzyna M. Kwiatkowska; Department of Medical and Surgical Sciences (DIMEC), University of Bologna, 40126 Bologna, Italy; katarzyn.kwiatkowsk2@unibo.it
# Corresponding author: Paolo Garagnani; Department of Medical and Surgical Sciences (DIMEC), University of Bologna, 40126 Bologna, Italy; IRCCS Azienda Ospedaliero-Universitaria di Bologna, 40138 Bologna, Italy; paolo.garagnani2@unibo.it
Supplementary Table S1. List and description of DNAm-based variables assessed in the study.
	Subset A	DNAmAge Clocks				Variable name	DNAm Biomarker Subset	Description	Reference	Link	DNAm Biomarker Calculation Platform or Source Code
		DNAmGrimAge components		Subset A	DNAmAge Clocks	DNAmAge	Subset A	DNAm age estimate based on methylation of 353 CpG sites. The original Horvath’s pan-tissue clock trained on many different human cell types & tissues.	Horvath, 2013	https://pubmed.ncbi.nlm.nih.gov/24138928/	https://dnamage.genetics.ucla.edu/
	Subset B	DNAmAge PC-Clocks				IEAA	Subset A	Intrinsic cell aging measure, which tries to eliminate effects of cellular composition.	Chen et al 2016	https://www.ncbi.nlm.nih.gov/pmc/articles/PMC5076441/	https://dnamage.genetics.ucla.edu/
		PC-DNAmGrimAge components				DNAmAgeHannum	Subset A	DNAm age estimate based on methylation of 71 CpG sites in blood.	Hannum et al., 2013	https://pubmed.ncbi.nlm.nih.gov/23177740/	https://dnamage.genetics.ucla.edu/
	Subset C	Blood Cell Counts				IEAA.Hannum	Subset A	Intrinsic cellular age age acceleration using a DNAmAgeHannum.	Hannum et al., 2013	http://www.ncbi.nlm.nih.gov/entrez/query.fcgi?cmd=Retrieve&db=PubMed&dopt=Abstract&list_uids=23177740	https://dnamage.genetics.ucla.edu/
						DNAmAgeSkinBloodClock	Subset A	DNAm age estimate (based on methylation of 391 CpG sites) for human fibroblasts, keratinocytes, buccal cells, endothelial cells, lymphoblastoidcells, skin, blood, and saliva samples.	Horvath et al., 2018	https://doi.org/10.18632/aging.101508	https://dnamage.genetics.ucla.edu/
	Subset D	Biological Traits				DNAmPhenoAge	Subset A	PhenoAge morbidity & mortality predictor.	Levine et al., 2018	http://www.ncbi.nlm.nih.gov/entrez/query.fcgi?cmd=Retrieve&db=PubMed&dopt=Abstract&list_uids=29676998	https://dnamage.genetics.ucla.edu/
						DNAmTL	Subset A	DNAm based estimate of telomere length.	Lu, Seeboth, et al., 2019	https://doi.org/10.18632%2Faging.102173	https://dnamage.genetics.ucla.edu/
	Subset E	CRP CpG Risk Score				DNAmGrimAgeBasedOnRealAge	Subset A	GrimAge is considered the best mortality predictor available. This model was build on eight DNAm based measures (DNAmADM, DNAmB2M, DNAmCystatinC, DNAmGDF15, DNAmLeptin, DNAmPACKYRS, DNAmPAI1, DNAmTIMP1), chronological age and sex.	Lu, Quach, et al., 2019	https://doi.org/10.18632/aging.101684	https://dnamage.genetics.ucla.edu/
						DNAmGrimAgeBasedOnPredictedAge	Subset A	GrimAge mortality predictor when imputing age with Skin&BloodAge clock.	Lu, Quach, et al., 2019	https://doi.org/10.18632/aging.101684	https://dnamage.genetics.ucla.edu/
	Subset F	Plasma Proteins – EpiScores				DNAmGrimAge2BasedOnRealAge	Subset A	Follow-on version of GrimAge with novel components added.	Lu et al., 2022	https://pubmed.ncbi.nlm.nih.gov/36516495/	https://dnamage.genetics.ucla.edu/
						DNAmGrimAge2BasedOnPredictedAge	Subset A	Follow-on version of GrimAge with novel components added.	Lu et al., 2022	https://pubmed.ncbi.nlm.nih.gov/36516495/	https://dnamage.genetics.ucla.edu/
						Epigenetic.Age.Zhang.	Subset A	DNAm-based age predictor built on 514 CpGs	Zhang et al., 2019	https://doi.org/10.1186/s13073-019-0667-1	https://dnamage.genetics.ucla.edu/
						AltumAge	Subset A	Deep neural network model using 20,318 CpGs for pan-tissue age prediction.	de Lima Camillo et al., 2022	https://doi.org/10.1038/s41514-022-00085-y	https://github.com/rsinghlab/AltumAge
						DunedinPoAm	Subset A	Single-timepoint, single-assay blood biomarker using elastic-net regression model to estimate pace of aging	Belsky et al., 2020	https://doi.org/10.7554%2FeLife.54870	https://github.com/danbelsky/DunedinPoAm38
						DunedinPACE	Subset A	Surrogate for the 20-year pace of aging.	Belsky et al., 2022	https://doi.org/10.7554/elife.73420	https://github.com/danbelsky/DunedinPACE
				Subset A	DNAmGrimAge components	DNAmADM	Subset A	DNAmGrimAge component. DNAm based prediction of plasma levels of adrenomedullin - a vasodilator peptide hormone.	Lu, Quach, et al., 2019	https://doi.org/10.18632/aging.101684	https://dnamage.genetics.ucla.edu/
						DNAmB2M	Subset A	DNAmGrimAge component. DNAm based prediction of plasma levels of beta-2 microglobulin - a component of major histocompatibility complex class 1 (MHC I) molecular.	Lu, Quach, et al., 2019	https://doi.org/10.18632/aging.101684	https://dnamage.genetics.ucla.edu/
						DNAmCystatinC	Subset A	DNAmGrimAge component. DNAm based prediction of plasma levels of cystatin C or (cystatin 3) – formerly called gamma trace, post-gamma-globulin, or neuroendocrine basic polypeptide.	Lu, Quach, et al., 2019	https://doi.org/10.18632/aging.101684	https://dnamage.genetics.ucla.edu/
						DNAmGDF15	Subset A	DNAmGrimAge component. DNAm based prediction of plasma levels of GDF-15 - growth differentiation factor 15.	Lu, Quach, et al., 2019	https://doi.org/10.18632/aging.101684	https://dnamage.genetics.ucla.edu/
						DNAmLeptin	Subset A	DNAmGrimAge component. DNAm based prediction of plasma levels of leptin - a hormone predominantly present in adipose cells.	Lu, Quach, et al., 2019	https://doi.org/10.18632/aging.101684	https://dnamage.genetics.ucla.edu/
						DNAmPACKYRS	Subset A	DNAmGrimAge component. DNAm based prediction of a number of pack of cigarettes smoked during 1 year.	Lu, Quach, et al., 2019	https://doi.org/10.18632/aging.101684	https://dnamage.genetics.ucla.edu/
						DNAmPAI1	Subset A	DNAmGrimAge component. DNAm based prediction of plasma levels of plasminogen activator inhibitor antigen type 1 (PAI-1) - the major inhibitor of tissue-type plasminogen activator and unokinase plasminogen activator.	Lu, Quach, et al., 2019	https://doi.org/10.18632/aging.101684	https://dnamage.genetics.ucla.edu/
						DNAmTIMP1	Subset A	DNAmGrimAge component. DNAm based prediction of plasma levels of TIMP-1 or TIMP metallopeptidase inhibitor 1 - a tissue inhibitor of metallo-proteinases.	Lu, Quach, et al., 2019	https://doi.org/10.18632/aging.101684	https://dnamage.genetics.ucla.edu/
						DNAmGDF_15	Subset A	DNAmGrimAge2 component. DNAm based prediction of plasma levels of GDF-15 - growth differentiation factor 15.	Lu, Quach, et al., 2019	https://doi.org/10.18632/aging.101684	https://dnamage.genetics.ucla.edu/
						DNAmCystatin_C	Subset A	DNAmGrimAge2 component. DNAm based prediction of plasma levels of cystatin C or (cystatin 3) – formerly called gamma trace, post-gamma-globulin, or neuroendocrine basic polypeptide.	Lu, Quach, et al., 2019	https://doi.org/10.18632/aging.101684	https://dnamage.genetics.ucla.edu/
						DNAmTIMP_1	Subset A	DNAmGrimAge2 component. DNAm based prediction of plasma levels of TIMP-1 or TIMP metallopeptidase inhibitor 1 - a tissue inhibitor of metallo-proteinases.	Lu, Quach, et al., 2019	https://doi.org/10.18632/aging.101684	https://dnamage.genetics.ucla.edu/
						DNAmadm	Subset A	DNAmGrimAge2 component. DNAm based prediction of plasma levels of adrenomedullin - a vasodilator peptide hormone.	Lu, Quach, et al., 2019	https://doi.org/10.18632/aging.101684	https://dnamage.genetics.ucla.edu/
						DNAmpai_1	Subset A	DNAmGrimAge2 component. DNAm based prediction of plasma levels of plasminogen activator inhibitor antigen type 1 (PAI-1) - the major inhibitor of tissue-type plasminogen activator and unokinase plasminogen activator.	Lu, Quach, et al., 2019	https://doi.org/10.18632/aging.101684	https://dnamage.genetics.ucla.edu/
						DNAmleptin	Subset A	DNAmGrimAge2 component. DNAm based prediction of plasma levels of leptin - a hormone predominantly present in adipose cells.	Lu, Quach, et al., 2019	https://doi.org/10.18632/aging.101684	https://dnamage.genetics.ucla.edu/
				Subset B	DNAmAge PC-Clocks	PCHorvath1	Subset B	Bolstered model of DNAmAgeSkinBloodClock improved with principal components from PCA.	Higgins-Chen et al., 2022	https://doi.org/10.1038%2Fs43587-022-00248-2	https://github.com/MorganLevineLab/PC-Clocks
						PCHorvath2	Subset B	Bolstered model of Horvath’s DNAmAge improved with principal components from PCA.	Higgins-Chen et al., 2022	https://doi.org/10.1038%2Fs43587-022-00248-2	https://github.com/MorganLevineLab/PC-Clocks
						PCHannum	Subset B	Bolstered model of DNAmAgeHannum improved with principal components from PCA.	Higgins-Chen et al., 2022	https://doi.org/10.1038%2Fs43587-022-00248-2	https://github.com/MorganLevineLab/PC-Clocks
						PCPhenoAge	Subset B	Bolstered model of DNAmPhenoAge improved with principal components from PCA.	Higgins-Chen et al., 2022	https://doi.org/10.1038%2Fs43587-022-00248-2	https://github.com/MorganLevineLab/PC-Clocks
						PCDNAmTL	Subset B	Bolstered model of DNAmTL improved with principal components from PCA.	Higgins-Chen et al., 2022	https://doi.org/10.1038%2Fs43587-022-00248-2	https://github.com/MorganLevineLab/PC-Clocks
						PCGrimAge	Subset B	Bolstered model of DNAmGrimAge improved with principal components from PCA.	Higgins-Chen et al., 2022	https://doi.org/10.1038%2Fs43587-022-00248-2	https://github.com/MorganLevineLab/PC-Clocks
				Subset B	PC-DNAmGrimAge components	PCADM	Subset B	Bolstered model of DNAmGrimAge component – ADM, improved with principal components from PCA.	Higgins-Chen et al., 2022	https://doi.org/10.1038%2Fs43587-022-00248-2	https://github.com/MorganLevineLab/PC-Clocks
						PCB2M	Subset B	Bolstered model of DNAmGrimAge component – B2M, improved with principal components from PCA.	Higgins-Chen et al., 2022	https://doi.org/10.1038%2Fs43587-022-00248-2	https://github.com/MorganLevineLab/PC-Clocks
						PCCystatinC	Subset B	Bolstered model of DNAmGrimAge component – Cystatin C, improved with principal components from PCA.	Higgins-Chen et al., 2022	https://doi.org/10.1038%2Fs43587-022-00248-2	https://github.com/MorganLevineLab/PC-Clocks
						PCGDF15	Subset B	Bolstered model of DNAmGrimAge component – GDF15, improved with principal components from PCA.	Higgins-Chen et al., 2022	https://doi.org/10.1038%2Fs43587-022-00248-2	https://github.com/MorganLevineLab/PC-Clocks
						PCLeptin	Subset B	Bolstered model of DNAmGrimAge component – Leptin, improved with principal components from PCA.	Higgins-Chen et al., 2022	https://doi.org/10.1038%2Fs43587-022-00248-2	https://github.com/MorganLevineLab/PC-Clocks
						PCPACKYRS	Subset B	Bolstered model of DNAmGrimAge component - a number of pack of cigarettes smoked during 1 year, improved with principal components from PCA.	Higgins-Chen et al., 2022	https://doi.org/10.1038%2Fs43587-022-00248-2	https://github.com/MorganLevineLab/PC-Clocks
						PCPAI1	Subset B	Bolstered model of DNAmGrimAge component – PAI-1, improved with principal components from PCA.	Higgins-Chen et al., 2022	https://doi.org/10.1038%2Fs43587-022-00248-2	https://github.com/MorganLevineLab/PC-Clocks
						PCTIMP1	Subset B	Bolstered model of DNAmGrimAge component – TIMP-1, improved with principal components from PCA.	Higgins-Chen et al., 2022	https://doi.org/10.1038%2Fs43587-022-00248-2	https://github.com/MorganLevineLab/PC-Clocks
				Subset C	Blood Cell Counts	CD8T	Subset C	Estimated abundance of CD8 T cells.	Aryee et al., 2014	https://www.ncbi.nlm.nih.gov/pmc/articles/PMC4016708/	https://dnamage.genetics.ucla.edu/
						CD4T	Subset C	Estimated abundance of CD4 T cells.	Aryee et al., 2014	https://www.ncbi.nlm.nih.gov/pmc/articles/PMC4016708/	https://dnamage.genetics.ucla.edu/
						NK	Subset C	Estimated abundance of Natural Killer cells.	Aryee et al., 2014	https://www.ncbi.nlm.nih.gov/pmc/articles/PMC4016708/	https://dnamage.genetics.ucla.edu/
						Bcell	Subset C	Estimated abundance of B cells.	Aryee et al., 2014	https://www.ncbi.nlm.nih.gov/pmc/articles/PMC4016708/	https://dnamage.genetics.ucla.edu/
						Mono	Subset C	Estimated abundance of Monocyte cells.	Aryee et al., 2014	https://www.ncbi.nlm.nih.gov/pmc/articles/PMC4016708/	https://dnamage.genetics.ucla.edu/
						Gran	Subset C	Estimated abundance of Granulocyte cells.	Aryee et al., 2014	https://www.ncbi.nlm.nih.gov/pmc/articles/PMC4016708/	https://dnamage.genetics.ucla.edu/
						PlasmaBlast	Subset C	Estimated abundance of Plasma Blast cells.	Horvath, 2013	https://pubmed.ncbi.nlm.nih.gov/24138928/	https://dnamage.genetics.ucla.edu/
						CD8pCD28nCD45RAn	Subset C	Estimated abundance of CD8pCD28nCD45RAn cells, a type of senescent CD8 T cell.	Horvath, 2013	https://pubmed.ncbi.nlm.nih.gov/24138928/	https://dnamage.genetics.ucla.edu/
						CD8.naive	Subset C	Estimated abundance of naive CD8 cells.	Horvath, 2013	https://pubmed.ncbi.nlm.nih.gov/24138928/	https://dnamage.genetics.ucla.edu/
						CD4.naive	Subset C	Estimated abundance of naive CD4 cells.	Horvath, 2013	https://pubmed.ncbi.nlm.nih.gov/24138928/	https://dnamage.genetics.ucla.edu/
				Subset D	Biological Traits	Alcohol	Subset D	DNAm-based surrrogate of alcohol consumption per week.	McCartney et al., 2018	https://doi.org/10.1186%2Fs13059-018-1514-1	https://dnamage.genetics.ucla.edu/
						Body.Mass.Index	Subset D	DNAm-based prediction of body mass index.	McCartney et al., 2018	https://doi.org/10.1186%2Fs13059-018-1514-1	https://dnamage.genetics.ucla.edu/
						Body.Fat.	Subset D	DNAm-based prediction of body fat percentage.	McCartney et al., 2018	https://doi.org/10.1186%2Fs13059-018-1514-1	https://dnamage.genetics.ucla.edu/
						HDL.Cholesterol	Subset D	DNAm-based prediction of high-density lipoprotein (HDL) cholesterol.	McCartney et al., 2018	https://doi.org/10.1186%2Fs13059-018-1514-1	https://dnamage.genetics.ucla.edu/
						Smoking	Subset D	DNAm-based surrogate of smoking status (current/ever/never).	McCartney et al., 2018	https://doi.org/10.1186%2Fs13059-018-1514-1	https://dnamage.genetics.ucla.edu/
						Waist.Hip.Ratio	Subset D	DNAm-based surrogate of waist-to-hip ratio.	McCartney et al., 2018	https://doi.org/10.1186%2Fs13059-018-1514-1	https://dnamage.genetics.ucla.edu/
				Subset E	CRP CpG Risk Score	CRP_CpG_risk_score	Subset E	DNA methylation signature of chronic low-grade inflammation as measured by C-Reactive protein (CRP).	Wielscher et al. 2022	https://pubmed.ncbi.nlm.nih.gov/35504910/	https://github.com/Mwielscher/EWAS_CRP
				Subset F	Plasma Proteins – EpiScores	Adiponectin	Subset F	DNAm-based surrogate for plasma levels of Adiponectin (ADIPOQ).	Gadd et al. 2022	https://pubmed.ncbi.nlm.nih.gov/35023833/	https://github.com/DanniGadd/EpiScores-for-protein-levels
						Afamin	Subset F	DNAm-based surrogate for plasma levels of Afamin (AFM).	Gadd et al. 2022	https://pubmed.ncbi.nlm.nih.gov/35023833/	https://github.com/DanniGadd/EpiScores-for-protein-levels
						Alpha1antichymotrypsin complex	Subset F	DNAm-based surrogate for plasma levels of alpha-1-antichymotrypsin complex (SERPINA3).	Gadd et al. 2022	https://pubmed.ncbi.nlm.nih.gov/35023833/	https://github.com/DanniGadd/EpiScores-for-protein-levels
						Aminoacylase1	Subset F	DNAm-based surrogate for plasma levels of Aminoacylase-1 (ACY1).	Gadd et al. 2022	https://pubmed.ncbi.nlm.nih.gov/35023833/	https://github.com/DanniGadd/EpiScores-for-protein-levels
						ATS13	Subset F	DNAm-based surrogate for plasma levels of ATS13 (ADAMTS13).	Gadd et al. 2022	https://pubmed.ncbi.nlm.nih.gov/35023833/	https://github.com/DanniGadd/EpiScores-for-protein-levels
						b2Microglobulin	Subset F	DNAm-based surrogate for plasma levels of b2-Microglobulin (B2M).	Gadd et al. 2022	https://pubmed.ncbi.nlm.nih.gov/35023833/	https://github.com/DanniGadd/EpiScores-for-protein-levels
						BCAM	Subset F	DNAm-based surrogate for plasma levels of BCAM.	Gadd et al. 2022	https://pubmed.ncbi.nlm.nih.gov/35023833/	https://github.com/DanniGadd/EpiScores-for-protein-levels
						BCMA	Subset F	DNAm-based surrogate for plasma levels of BCMA (TNFRSF17).	Gadd et al. 2022	https://pubmed.ncbi.nlm.nih.gov/35023833/	https://github.com/DanniGadd/EpiScores-for-protein-levels
						BMP1	Subset F	DNAm-based surrogate for plasma levels of BMP-1.	Gadd et al. 2022	https://pubmed.ncbi.nlm.nih.gov/35023833/	https://github.com/DanniGadd/EpiScores-for-protein-levels
						C4	Subset F	DNAm-based surrogate for plasma levels of C4.	Gadd et al. 2022	https://pubmed.ncbi.nlm.nih.gov/35023833/	https://github.com/DanniGadd/EpiScores-for-protein-levels
						C5a	Subset F	DNAm-based surrogate for plasma levels of C5a.	Gadd et al. 2022	https://pubmed.ncbi.nlm.nih.gov/35023833/	https://github.com/DanniGadd/EpiScores-for-protein-levels
						C9	Subset F	DNAm-based surrogate for plasma levels of C9.	Gadd et al. 2022	https://pubmed.ncbi.nlm.nih.gov/35023833/	https://github.com/DanniGadd/EpiScores-for-protein-levels
						Calgranulin B	Subset F	DNAm-based surrogate for plasma levels of calgranulin B (S100A9).	Gadd et al. 2022	https://pubmed.ncbi.nlm.nih.gov/35023833/	https://github.com/DanniGadd/EpiScores-for-protein-levels
						CCL11	Subset F	DNAm-based surrogate for plasma levels of CCL11.	Gadd et al. 2022	https://pubmed.ncbi.nlm.nih.gov/35023833/	https://github.com/DanniGadd/EpiScores-for-protein-levels
						CCL21	Subset F	DNAm-based surrogate for plasma levels of CCL21.	Gadd et al. 2022	https://pubmed.ncbi.nlm.nih.gov/35023833/	https://github.com/DanniGadd/EpiScores-for-protein-levels
						CD23	Subset F	DNAm-based surrogate for plasma levels of CD23 (FCER2).	Gadd et al. 2022	https://pubmed.ncbi.nlm.nih.gov/35023833/	https://github.com/DanniGadd/EpiScores-for-protein-levels
						CD48	Subset F	DNAm-based surrogate for plasma levels of CD48.	Gadd et al. 2022	https://pubmed.ncbi.nlm.nih.gov/35023833/	https://github.com/DanniGadd/EpiScores-for-protein-levels
						CD5L	Subset F	DNAm-based surrogate for plasma levels of CD5L.	Gadd et al. 2022	https://pubmed.ncbi.nlm.nih.gov/35023833/	https://github.com/DanniGadd/EpiScores-for-protein-levels
						CD6	Subset F	DNAm-based surrogate for plasma levels of CD6.	Gadd et al. 2022	https://pubmed.ncbi.nlm.nih.gov/35023833/	https://github.com/DanniGadd/EpiScores-for-protein-levels
						Chitotriosidase1	Subset F	DNAm-based surrogate for plasma levels of Chitotriosidase-1 (CHIT1).	Gadd et al. 2022	https://pubmed.ncbi.nlm.nih.gov/35023833/	https://github.com/DanniGadd/EpiScores-for-protein-levels
						Coagulation Factor VII	Subset F	DNAm-based surrogate for plasma levels of Coagulation Factor VII (F7).	Gadd et al. 2022	https://pubmed.ncbi.nlm.nih.gov/35023833/	https://github.com/DanniGadd/EpiScores-for-protein-levels
						Contactin4	Subset F	DNAm-based surrogate for plasma levels of Contactin-4 (CNTN4).	Gadd et al. 2022	https://pubmed.ncbi.nlm.nih.gov/35023833/	https://github.com/DanniGadd/EpiScores-for-protein-levels
						CRP	Subset F	DNAm-based surrogate for plasma levels of CRP.	Gadd et al. 2022	https://pubmed.ncbi.nlm.nih.gov/35023833/	https://github.com/DanniGadd/EpiScores-for-protein-levels
						CRTAM	Subset F	DNAm-based surrogate for plasma levels of CRTAM.	Gadd et al. 2022	https://pubmed.ncbi.nlm.nih.gov/35023833/	https://github.com/DanniGadd/EpiScores-for-protein-levels
						CXCL10	Subset F	DNAm-based surrogate for plasma levels of IP-10 (CXCL10).	Gadd et al. 2022	https://pubmed.ncbi.nlm.nih.gov/35023833/	https://github.com/DanniGadd/EpiScores-for-protein-levels
						CXCL11	Subset F	DNAm-based surrogate for plasma levels of I-TAC (CXCL11).	Gadd et al. 2022	https://pubmed.ncbi.nlm.nih.gov/35023833/	https://github.com/DanniGadd/EpiScores-for-protein-levels
						CXCL9	Subset F	DNAm-based surrogate for plasma levels of CXCL9.	Gadd et al. 2022	https://pubmed.ncbi.nlm.nih.gov/35023833/	https://github.com/DanniGadd/EpiScores-for-protein-levels
						DCSIGN	Subset F	DNAm-based surrogate for plasma levels of DC-SIGN (CD209).	Gadd et al. 2022	https://pubmed.ncbi.nlm.nih.gov/35023833/	https://github.com/DanniGadd/EpiScores-for-protein-levels
						EDA	Subset F	DNAm-based surrogate for plasma levels of EDA.	Gadd et al. 2022	https://pubmed.ncbi.nlm.nih.gov/35023833/	https://github.com/DanniGadd/EpiScores-for-protein-levels
						EN-RAGE	Subset F	DNAm-based surrogate for plasma levels of S100A12.	Gadd et al. 2022	https://pubmed.ncbi.nlm.nih.gov/35023833/	https://github.com/DanniGadd/EpiScores-for-protein-levels
						Endocan	Subset F	DNAm-based surrogate for plasma levels of Endocan (ESM1).	Gadd et al. 2022	https://pubmed.ncbi.nlm.nih.gov/35023833/	https://github.com/DanniGadd/EpiScores-for-protein-levels
						ENPP7	Subset F	DNAm-based surrogate for plasma levels of ENPP7.	Gadd et al. 2022	https://pubmed.ncbi.nlm.nih.gov/35023833/	https://github.com/DanniGadd/EpiScores-for-protein-levels
						EZR	Subset F	DNAm-based surrogate for plasma levels of EZR.	Gadd et al. 2022	https://pubmed.ncbi.nlm.nih.gov/35023833/	https://github.com/DanniGadd/EpiScores-for-protein-levels
						FCG3B	Subset F	DNAm-based surrogate for plasma levels of FCG3B.	Gadd et al. 2022	https://pubmed.ncbi.nlm.nih.gov/35023833/	https://github.com/DanniGadd/EpiScores-for-protein-levels
						FcRL2	Subset F	DNAm-based surrogate for plasma levels of FCRL2.	Gadd et al. 2022	https://pubmed.ncbi.nlm.nih.gov/35023833/	https://github.com/DanniGadd/EpiScores-for-protein-levels
						FGF 21	Subset F	DNAm-based surrogate for plasma levels of FGF21.	Gadd et al. 2022	https://pubmed.ncbi.nlm.nih.gov/35023833/	https://github.com/DanniGadd/EpiScores-for-protein-levels
						Galectin4	Subset F	DNAm-based surrogate for plasma levels of Galectin-4 (LGALS4).	Gadd et al. 2022	https://pubmed.ncbi.nlm.nih.gov/35023833/	https://github.com/DanniGadd/EpiScores-for-protein-levels
						GCSF	Subset F	DNAm-based surrogate for plasma levels of CSF3.	Gadd et al. 2022	https://pubmed.ncbi.nlm.nih.gov/35023833/	https://github.com/DanniGadd/EpiScores-for-protein-levels
						GDF8	Subset F	DNAm-based surrogate for plasma levels of MSTN.	Gadd et al. 2022	https://pubmed.ncbi.nlm.nih.gov/35023833/	https://github.com/DanniGadd/EpiScores-for-protein-levels
						GHR	Subset F	DNAm-based surrogate for plasma levels of Growth hormone receptor (GHR).	Gadd et al. 2022	https://pubmed.ncbi.nlm.nih.gov/35023833/	https://github.com/DanniGadd/EpiScores-for-protein-levels
						GP1BA	Subset F	DNAm-based surrogate for plasma levels of GP1BA.	Gadd et al. 2022	https://pubmed.ncbi.nlm.nih.gov/35023833/	https://github.com/DanniGadd/EpiScores-for-protein-levels
						Granulysin	Subset F	DNAm-based surrogate for plasma levels of Granulysin (GNLY).	Gadd et al. 2022	https://pubmed.ncbi.nlm.nih.gov/35023833/	https://github.com/DanniGadd/EpiScores-for-protein-levels
						granzyme A	Subset F	DNAm-based surrogate for plasma levels of granzyme A.	Gadd et al. 2022	https://pubmed.ncbi.nlm.nih.gov/35023833/	https://github.com/DanniGadd/EpiScores-for-protein-levels
						GZMA	Subset F	DNAm-based surrogate for plasma levels of GZMA.	Gadd et al. 2022	https://pubmed.ncbi.nlm.nih.gov/35023833/	https://github.com/DanniGadd/EpiScores-for-protein-levels
						Heparin cofactor II	Subset F	DNAm-based surrogate for plasma levels of Heparin cofactor II (SERPIND1).	Gadd et al. 2022	https://pubmed.ncbi.nlm.nih.gov/35023833/	https://github.com/DanniGadd/EpiScores-for-protein-levels
						HGF	Subset F	DNAm-based surrogate for plasma levels of HGF.	Gadd et al. 2022	https://pubmed.ncbi.nlm.nih.gov/35023833/	https://github.com/DanniGadd/EpiScores-for-protein-levels
						HGFA	Subset F	DNAm-based surrogate for plasma levels of HGFA.	Gadd et al. 2022	https://pubmed.ncbi.nlm.nih.gov/35023833/	https://github.com/DanniGadd/EpiScores-for-protein-levels
						IDUA	Subset F	DNAm-based surrogate for plasma levels of IDUA.	Gadd et al. 2022	https://pubmed.ncbi.nlm.nih.gov/35023833/	https://github.com/DanniGadd/EpiScores-for-protein-levels
						IGFBP1	Subset F	DNAm-based surrogate for plasma levels of IGFBP-1.	Gadd et al. 2022	https://pubmed.ncbi.nlm.nih.gov/35023833/	https://github.com/DanniGadd/EpiScores-for-protein-levels
						IGFBP4	Subset F	DNAm-based surrogate for plasma levels of IGFBP-4.	Gadd et al. 2022	https://pubmed.ncbi.nlm.nih.gov/35023833/	https://github.com/DanniGadd/EpiScores-for-protein-levels
						IL19	Subset F	DNAm-based surrogate for plasma levels of IL-19.	Gadd et al. 2022	https://pubmed.ncbi.nlm.nih.gov/35023833/	https://github.com/DanniGadd/EpiScores-for-protein-levels
						IP10	Subset F	DNAm-based surrogate for plasma levels of CXCL10.	Gadd et al. 2022	https://pubmed.ncbi.nlm.nih.gov/35023833/	https://github.com/DanniGadd/EpiScores-for-protein-levels
						IR	Subset F	DNAm-based surrogate for plasma levels of IR (INSR).	Gadd et al. 2022	https://pubmed.ncbi.nlm.nih.gov/35023833/	https://github.com/DanniGadd/EpiScores-for-protein-levels
						ITAC	Subset F	DNAm-based surrogate for plasma levels of CXCL11.	Gadd et al. 2022	https://pubmed.ncbi.nlm.nih.gov/35023833/	https://github.com/DanniGadd/EpiScores-for-protein-levels
						Lactoferrin	Subset F	DNAm-based surrogate for plasma levels of Lactoferrin (LTF).	Gadd et al. 2022	https://pubmed.ncbi.nlm.nih.gov/35023833/	https://github.com/DanniGadd/EpiScores-for-protein-levels
						LG3BP	Subset F	DNAm-based surrogate for plasma levels of LG3BP (LGALS3BP).	Gadd et al. 2022	https://pubmed.ncbi.nlm.nih.gov/35023833/	https://github.com/DanniGadd/EpiScores-for-protein-levels
						LY9	Subset F	DNAm-based surrogate for plasma levels of LY9.	Gadd et al. 2022	https://pubmed.ncbi.nlm.nih.gov/35023833/	https://github.com/DanniGadd/EpiScores-for-protein-levels
						Lymphotoxin a1b2	Subset F	DNAm-based surrogate for plasma levels of Lymphotoxin a1/b2 (LTA|LTB).	Gadd et al. 2022	https://pubmed.ncbi.nlm.nih.gov/35023833/	https://github.com/DanniGadd/EpiScores-for-protein-levels
						Lysozyme	Subset F	DNAm-based surrogate for plasma levels of Lysozyme (LYZ).	Gadd et al. 2022	https://pubmed.ncbi.nlm.nih.gov/35023833/	https://github.com/DanniGadd/EpiScores-for-protein-levels
						MDC	Subset F	DNAm-based surrogate for plasma levels of MDC (CCL22).	Gadd et al. 2022	https://pubmed.ncbi.nlm.nih.gov/35023833/	https://github.com/DanniGadd/EpiScores-for-protein-levels
						MIA	Subset F	DNAm-based surrogate for plasma levels of MIA.	Gadd et al. 2022	https://pubmed.ncbi.nlm.nih.gov/35023833/	https://github.com/DanniGadd/EpiScores-for-protein-levels
						MMP1	Subset F	DNAm-based surrogate for plasma levels of MMP-1.	Gadd et al. 2022	https://pubmed.ncbi.nlm.nih.gov/35023833/	https://github.com/DanniGadd/EpiScores-for-protein-levels
						MMP1	Subset F	DNAm-based surrogate for plasma levels of N/A (MMP1).	Gadd et al. 2022	https://pubmed.ncbi.nlm.nih.gov/35023833/	https://github.com/DanniGadd/EpiScores-for-protein-levels
						MMP12	Subset F	DNAm-based surrogate for plasma levels of MMP-12.	Gadd et al. 2022	https://pubmed.ncbi.nlm.nih.gov/35023833/	https://github.com/DanniGadd/EpiScores-for-protein-levels
						MMP2	Subset F	DNAm-based surrogate for plasma levels of MMP-2.	Gadd et al. 2022	https://pubmed.ncbi.nlm.nih.gov/35023833/	https://github.com/DanniGadd/EpiScores-for-protein-levels
						MMP9	Subset F	DNAm-based surrogate for plasma levels of MMP-9.	Gadd et al. 2022	https://pubmed.ncbi.nlm.nih.gov/35023833/	https://github.com/DanniGadd/EpiScores-for-protein-levels
						MPL	Subset F	DNAm-based surrogate for plasma levels of Thrombopoietin Receptor (MPL).	Gadd et al. 2022	https://pubmed.ncbi.nlm.nih.gov/35023833/	https://github.com/DanniGadd/EpiScores-for-protein-levels
						MRC2	Subset F	DNAm-based surrogate for plasma levels of MRC2.	Gadd et al. 2022	https://pubmed.ncbi.nlm.nih.gov/35023833/	https://github.com/DanniGadd/EpiScores-for-protein-levels
						MSP	Subset F	DNAm-based surrogate for plasma levels of MSP (MST1).	Gadd et al. 2022	https://pubmed.ncbi.nlm.nih.gov/35023833/	https://github.com/DanniGadd/EpiScores-for-protein-levels
						Myeloperoxidase	Subset F	DNAm-based surrogate for plasma levels of Myeloperoxidase (MPO).	Gadd et al. 2022	https://pubmed.ncbi.nlm.nih.gov/35023833/	https://github.com/DanniGadd/EpiScores-for-protein-levels
						NCAM120	Subset F	DNAm-based surrogate for plasma levels of NCAM-120.	Gadd et al. 2022	https://pubmed.ncbi.nlm.nih.gov/35023833/	https://github.com/DanniGadd/EpiScores-for-protein-levels
						NCDase	Subset F	DNAm-based surrogate for plasma levels of ASAH2.	Gadd et al. 2022	https://pubmed.ncbi.nlm.nih.gov/35023833/	https://github.com/DanniGadd/EpiScores-for-protein-levels
						NEP	Subset F	DNAm-based surrogate for plasma levels of MME.	Gadd et al. 2022	https://pubmed.ncbi.nlm.nih.gov/35023833/	https://github.com/DanniGadd/EpiScores-for-protein-levels
						NMNAT1	Subset F	DNAm-based surrogate for plasma levels of NMNAT1.	Gadd et al. 2022	https://pubmed.ncbi.nlm.nih.gov/35023833/	https://github.com/DanniGadd/EpiScores-for-protein-levels
						Notch1	Subset F	DNAm-based surrogate for plasma levels of Notch 1.	Gadd et al. 2022	https://pubmed.ncbi.nlm.nih.gov/35023833/	https://github.com/DanniGadd/EpiScores-for-protein-levels
						NTRK3	Subset F	DNAm-based surrogate for plasma levels of TrkC (NTRK3).	Gadd et al. 2022	https://pubmed.ncbi.nlm.nih.gov/35023833/	https://github.com/DanniGadd/EpiScores-for-protein-levels
						OMD	Subset F	DNAm-based surrogate for plasma levels of OMD.	Gadd et al. 2022	https://pubmed.ncbi.nlm.nih.gov/35023833/	https://github.com/DanniGadd/EpiScores-for-protein-levels
						OSM	Subset F	DNAm-based surrogate for plasma levels of OSM.	Gadd et al. 2022	https://pubmed.ncbi.nlm.nih.gov/35023833/	https://github.com/DanniGadd/EpiScores-for-protein-levels
						PAPPA	Subset F	DNAm-based surrogate for plasma levels of PAPP-A.	Gadd et al. 2022	https://pubmed.ncbi.nlm.nih.gov/35023833/	https://github.com/DanniGadd/EpiScores-for-protein-levels
						PARC	Subset F	DNAm-based surrogate for plasma levels of PARC (CCL18).	Gadd et al. 2022	https://pubmed.ncbi.nlm.nih.gov/35023833/	https://github.com/DanniGadd/EpiScores-for-protein-levels
						PIGR	Subset F	DNAm-based surrogate for plasma levels of PIGR.	Gadd et al. 2022	https://pubmed.ncbi.nlm.nih.gov/35023833/	https://github.com/DanniGadd/EpiScores-for-protein-levels
						Resistin	Subset F	DNAm-based surrogate for plasma levels of resistin (RETN).	Gadd et al. 2022	https://pubmed.ncbi.nlm.nih.gov/35023833/	https://github.com/DanniGadd/EpiScores-for-protein-levels
						sCD163	Subset F	DNAm-based surrogate for plasma levels of sCD163.	Gadd et al. 2022	https://pubmed.ncbi.nlm.nih.gov/35023833/	https://github.com/DanniGadd/EpiScores-for-protein-levels
						SCGFalpha	Subset F	DNAm-based surrogate for plasma levels of SCGF-alpha (CLEC11A).	Gadd et al. 2022	https://pubmed.ncbi.nlm.nih.gov/35023833/	https://github.com/DanniGadd/EpiScores-for-protein-levels
						SCGFbeta	Subset F	DNAm-based surrogate for plasma levels of SCGF-beta (CLEC11A).	Gadd et al. 2022	https://pubmed.ncbi.nlm.nih.gov/35023833/	https://github.com/DanniGadd/EpiScores-for-protein-levels
						Semaphorin 3E	Subset F	DNAm-based surrogate for plasma levels of Semaphorin 3E (SEMA3E).	Gadd et al. 2022	https://pubmed.ncbi.nlm.nih.gov/35023833/	https://github.com/DanniGadd/EpiScores-for-protein-levels
						SEPR	Subset F	DNAm-based surrogate for plasma levels of SEPR (FAP).	Gadd et al. 2022	https://pubmed.ncbi.nlm.nih.gov/35023833/	https://github.com/DanniGadd/EpiScores-for-protein-levels
						sESelectin	Subset F	DNAm-based surrogate for plasma levels of sE-Selectin (SELE).	Gadd et al. 2022	https://pubmed.ncbi.nlm.nih.gov/35023833/	https://github.com/DanniGadd/EpiScores-for-protein-levels
						SHBG	Subset F	DNAm-based surrogate for plasma levels of SHBG (SHBG).	Gadd et al. 2022	https://pubmed.ncbi.nlm.nih.gov/35023833/	https://github.com/DanniGadd/EpiScores-for-protein-levels
						sICAM5	Subset F	DNAm-based surrogate for plasma levels of sICAM-5.	Gadd et al. 2022	https://pubmed.ncbi.nlm.nih.gov/35023833/	https://github.com/DanniGadd/EpiScores-for-protein-levels
						SIGLEC1	Subset F	DNAm-based surrogate for plasma levels of SIGLEC1.	Gadd et al. 2022	https://pubmed.ncbi.nlm.nih.gov/35023833/	https://github.com/DanniGadd/EpiScores-for-protein-levels
						SKR3	Subset F	DNAm-based surrogate for plasma levels of ACVRL1.	Gadd et al. 2022	https://pubmed.ncbi.nlm.nih.gov/35023833/	https://github.com/DanniGadd/EpiScores-for-protein-levels
						SLIK5	Subset F	DNAm-based surrogate for plasma levels of SLIK5.	Gadd et al. 2022	https://pubmed.ncbi.nlm.nih.gov/35023833/	https://github.com/DanniGadd/EpiScores-for-protein-levels
						sLSelectin	Subset F	DNAm-based surrogate for plasma levels of sL-Selectin (SELL).	Gadd et al. 2022	https://pubmed.ncbi.nlm.nih.gov/35023833/	https://github.com/DanniGadd/EpiScores-for-protein-levels
						SMPD1	Subset F	DNAm-based surrogate for plasma levels of SMPD1.	Gadd et al. 2022	https://pubmed.ncbi.nlm.nih.gov/35023833/	https://github.com/DanniGadd/EpiScores-for-protein-levels
						Stanniocalcin1	Subset F	DNAm-based surrogate for plasma levels of Stanniocalcin-1 (STC1).	Gadd et al. 2022	https://pubmed.ncbi.nlm.nih.gov/35023833/	https://github.com/DanniGadd/EpiScores-for-protein-levels
						TARC	Subset F	DNAm-based surrogate for plasma levels of TARC (CCL17).	Gadd et al. 2022	https://pubmed.ncbi.nlm.nih.gov/35023833/	https://github.com/DanniGadd/EpiScores-for-protein-levels
						TECK	Subset F	DNAm-based surrogate for plasma levels of TECK (CCL25).	Gadd et al. 2022	https://pubmed.ncbi.nlm.nih.gov/35023833/	https://github.com/DanniGadd/EpiScores-for-protein-levels
						Testican2	Subset F	DNAm-based surrogate for plasma levels of Testican-2 (SPOCK2).	Gadd et al. 2022	https://pubmed.ncbi.nlm.nih.gov/35023833/	https://github.com/DanniGadd/EpiScores-for-protein-levels
						TGF alpha	Subset F	DNAm-based surrogate for plasma levels of TGFA.	Gadd et al. 2022	https://pubmed.ncbi.nlm.nih.gov/35023833/	https://github.com/DanniGadd/EpiScores-for-protein-levels
						THBS2	Subset F	DNAm-based surrogate for plasma levels of TSP2 (THBS2).	Gadd et al. 2022	https://pubmed.ncbi.nlm.nih.gov/35023833/	https://github.com/DanniGadd/EpiScores-for-protein-levels
						TIG2	Subset F	DNAm-based surrogate for plasma levels of TIG2 (RARRES2).	Gadd et al. 2022	https://pubmed.ncbi.nlm.nih.gov/35023833/	https://github.com/DanniGadd/EpiScores-for-protein-levels
						TNF sRII	Subset F	DNAm-based surrogate for plasma levels of TNF sR-II (TNFRSF1B).	Gadd et al. 2022	https://pubmed.ncbi.nlm.nih.gov/35023833/	https://github.com/DanniGadd/EpiScores-for-protein-levels
						TPSB2	Subset F	DNAm-based surrogate for plasma levels of TPSB2 (TPSB2).	Gadd et al. 2022	https://pubmed.ncbi.nlm.nih.gov/35023833/	https://github.com/DanniGadd/EpiScores-for-protein-levels
						TrkC	Subset F	DNAm-based surrogate for plasma levels of NTRK3.	Gadd et al. 2022	https://pubmed.ncbi.nlm.nih.gov/35023833/	https://github.com/DanniGadd/EpiScores-for-protein-levels
						Trypsin 2	Subset F	DNAm-based surrogate for plasma levels of Trypsin 2 (PRSS2).	Gadd et al. 2022	https://pubmed.ncbi.nlm.nih.gov/35023833/	https://github.com/DanniGadd/EpiScores-for-protein-levels
						VCAM1	Subset F	DNAm-based surrogate for plasma levels of VCAM-1.	Gadd et al. 2022	https://pubmed.ncbi.nlm.nih.gov/35023833/	https://github.com/DanniGadd/EpiScores-for-protein-levels
						VEGFA	Subset F	DNAm-based surrogate for plasma levels of VEGFA.	Gadd et al. 2022	https://pubmed.ncbi.nlm.nih.gov/35023833/	https://github.com/DanniGadd/EpiScores-for-protein-levels
						WFKN2	Subset F	DNAm-based surrogate for plasma levels of WFKN2.	Gadd et al. 2022	https://pubmed.ncbi.nlm.nih.gov/35023833/	https://github.com/DanniGadd/EpiScores-for-protein-levels
