# Supplementary material for: Painful diabetic neuropathy is associated with accelerated epigenetic aging
Source: GeroScience. 2025 Jan 23;47(3):4041–54. doi: 10.1007/s11357-025-01516-w (PMC12181573; doi:10.1007/s11357-025-01516-w)
Supplement: Supplementary file 12 — Supplementary file12 (XLSX 11 KB) [file 11357_2025_1516_MOESM12_ESM.xlsx]

## Sheet: SupplementaryTableS2
# Article title: Painful diabetic neuropathy is associated with accelerated epigenetic aging
# Journal name: GeroScience
# Author names: Katarzyna M. Kwiatkowska, Paolo Garagnani, Massimiliano Bonafé, Maria Giulia Bacalini, Luciano Calzari, Davide Gentilini, Dan Ziegler, Monique M. Gerrits, Catharina G. Faber, Rayaz A. Malik, Margherita Marchi, Erika Salvi, Giuseppe Lauria# and Chiara Pirazzini
# Corresponding author: Katarzyna M. Kwiatkowska; Department of Medical and Surgical Sciences (DIMEC), University of Bologna, 40126 Bologna, Italy; katarzyn.kwiatkowsk2@unibo.it
# Corresponding author: Paolo Garagnani; Department of Medical and Surgical Sciences (DIMEC), University of Bologna, 40126 Bologna, Italy; IRCCS Azienda Ospedaliero-Universitaria di Bologna, 40138 Bologna, Italy; paolo.garagnani2@unibo.it
Supplementary Table S2. Results of two-stage residual-outcome regression analysis for subset A of biomarkers: epigenetic clocks and the component parts of DNAmGrimAge clock, comparing patients with painful diabetic neuropathy (PDN), painless diabetic neuropathy (PLDN) and healthy controls (CTRL). For each DNAm-based estimate mean values of residuals in the three groups are reported accompanied by…
		Subset A	Number of Outliers	Average B-value (Age-adj)			P-value
		DNAm Variable Name		PDN	CTRL	PLDN	PDN vs PLDN	PLDN vs CTRL	PDN vs CTRL
	DNAmAge Clocks	DNAmTL	0	-0.0609675	0.0421693	-1.3861e-15	0.00246625	0.0366487	6.02438e-06
		DNAmAgeHannum	0	2.23176	-4.78579	5.50146e-14	0.011136	2.64971e-11	5.719e-15
		DNAmGrimAgeBasedOnPredictedAge	1	1.39087	-2.25684	-9.22033e-15	0.0278744	0.000389095	3.43243e-07
		DNAmAgeSkinBloodClock	1	1.06182	-1.16005	4.92501e-14	0.0279288	0.00371622	2.0709e-06
		DunedinPoAm	2	0.0277481	-0.0743123	-1.02119e-16	0.0376316	7.97435e-08	1.9001e-11
		DNAmGrimAge2BasedOnPredictedAge	1	1.24223	-2.66222	2.54924e-14	0.0544349	7.81294e-05	7.31231e-08
		DNAmPhenoAge	2	1.41241	-5.39057	1.62186e-14	0.0680365	1.35679e-12	2.97897e-16
		AltumAge	3	0.887163	-0.904106	3.7714e-15	0.073922	0.0469199	0.00046318
		DunedinPACE	0	0.0243182	-0.0963638	4.3399e-16	0.133569	2.38644e-09	2.45828e-11
		DNAmAge	4	0.919313	-2.49179	3.17564e-14	0.214537	0.000134939	2.87817e-05
		DNAmGrimAgeBasedOnRealAge	0	0.644838	-1.55388	1.76021e-14	0.215419	0.0040571	0.000197859
		DNAmGrimAge2BasedOnRealAge	0	0.55376	-2.02542	4.55391e-14	0.330949	0.000688257	4.53278e-05
		IEAA.Hannum	6	0.371762	-2.36791	-8.84662e-16	0.564692	0.000141673	5.21391e-05
		Epigenetic.Age.Zhang.	1	-0.0429002	-0.307778	4.33954e-16	0.746861	0.00933343	0.0564476
		IEAA	7	0.043051	-1.1186	-1.30973e-15	0.94476	0.0583402	0.0853907
	DNAmGrimAge components	DNAmPAI1	2	638.23	-2762.69	4.24387e-12	0.0874839	6.79518e-14	1.80664e-17
		DNAmpai_1	2	636.97	-2758.45	6.97236e-12	0.0878959	7.2194e-14	1.93152e-17
		DNAmGDF15	5	-32.092	22.4156	-9.34193e-13	0.120703	0.248163	0.011442
		DNAmTIMP_1	3	141.435	-376.511	-2.71599e-11	0.180811	6.88133e-05	2.31244e-06
		DNAmB2M	0	10869.6	-25347.4	4.70956e-10	0.285108	0.0300519	0.00233179
		DNAmCystatin_C	3	3060.04	-4544.91	-5.66083e-10	0.285603	0.17209	0.0189003
		DNAmadm	3	1.86577	-9.50272	9.9476e-14	0.376027	8.14011e-06	3.43544e-06
		DNAmGDF_15	5	-17.1944	17.0888	-4.04481e-13	0.39473	0.385343	0.110587
		DNAmADM	2	1.65959	-8.32748	1.81725e-13	0.415648	3.6389e-05	2.72063e-05
		DNAmleptin	2	404.618	672.478	6.0403e-12	0.464619	0.226842	0.661238
		DNAmLeptin	2	404.618	672.478	-1.77047e-12	0.464619	0.226842	0.661238
		DNAmPACKYRS	20	0.646123	-0.211379	1.1454e-14	0.553323	0.835008	0.441547
		DNAmCystatinC	1	539.404	-1746.58	-1.19062e-10	0.82803	0.542248	0.414295
		DNAmTIMP1	0	-9.34603	-236.856	-1.36424e-11	0.902769	0.000557609	0.00412703
