# Supplementary material for: Painful diabetic neuropathy is associated with accelerated epigenetic aging
Source: GeroScience. 2025 Jan 23;47(3):4041–54. doi: 10.1007/s11357-025-01516-w (PMC12181573; doi:10.1007/s11357-025-01516-w)
Supplement: Supplementary file 16 — Supplementary file16 (XLSX 8 KB) [file 11357_2025_1516_MOESM16_ESM.xlsx]

## Sheet: SupplementaryTableS6
# Article title: Painful diabetic neuropathy is associated with accelerated epigenetic aging
# Journal name: GeroScience
# Author names: Katarzyna M. Kwiatkowska, Paolo Garagnani, Massimiliano Bonafé, Maria Giulia Bacalini, Luciano Calzari, Davide Gentilini, Dan Ziegler, Monique M. Gerrits, Catharina G. Faber, Rayaz A. Malik, Margherita Marchi, Erika Salvi, Giuseppe Lauria# and Chiara Pirazzini
# Corresponding author: Katarzyna M. Kwiatkowska; Department of Medical and Surgical Sciences (DIMEC), University of Bologna, 40126 Bologna, Italy; katarzyn.kwiatkowsk2@unibo.it
# Corresponding author: Paolo Garagnani; Department of Medical and Surgical Sciences (DIMEC), University of Bologna, 40126 Bologna, Italy; IRCCS Azienda Ospedaliero-Universitaria di Bologna, 40138 Bologna, Italy; paolo.garagnani2@unibo.it
Supplementary Table S6. Results of two-stage residual-outcome regression analysis for subset E : CRP-associated risk score, comparing patients with painful diabetic neuropathy (PDN), painless diabetic neuropathy (PLDN) and healthy controls (CTRL). For each DNAm-based estimate mean values of residuals in the three groups are reported accompanied by corresponding p-values obtained with one-sided St…
	Subset E	Number of Outliers	Average B-value (Age-adj)			P-value
	DNAm Variable Name		PDN	CTRL	PLDN	PDN vs PLDN	PLDN vs CTRL	PDN vs CTRL
	CRP_CpG_risk_score	2	5.40078	-16.5626	3.53947e-15	0.1926	0.000234848	3.47614e-06
