# Supplementary material for: Painful diabetic neuropathy is associated with accelerated epigenetic aging
Source: GeroScience. 2025 Jan 23;47(3):4041–54. doi: 10.1007/s11357-025-01516-w (PMC12181573; doi:10.1007/s11357-025-01516-w)
Supplement: Supplementary file 17 — Supplementary file17 (XLSX 19 KB) [file 11357_2025_1516_MOESM17_ESM.xlsx]

## Sheet: SupplementaryTableS7
# Article title: Painful diabetic neuropathy is associated with accelerated epigenetic aging
# Journal name: GeroScience
# Author names: Katarzyna M. Kwiatkowska, Paolo Garagnani, Massimiliano Bonafé, Maria Giulia Bacalini, Luciano Calzari, Davide Gentilini, Dan Ziegler, Monique M. Gerrits, Catharina G. Faber, Rayaz A. Malik, Margherita Marchi, Erika Salvi, Giuseppe Lauria# and Chiara Pirazzini
# Corresponding author: Katarzyna M. Kwiatkowska; Department of Medical and Surgical Sciences (DIMEC), University of Bologna, 40126 Bologna, Italy; katarzyn.kwiatkowsk2@unibo.it
# Corresponding author: Paolo Garagnani; Department of Medical and Surgical Sciences (DIMEC), University of Bologna, 40126 Bologna, Italy; IRCCS Azienda Ospedaliero-Universitaria di Bologna, 40138 Bologna, Italy; paolo.garagnani2@unibo.it
Supplementary Table S7. Results of two-stage residual-outcome regression analysis for subset F of biomarkers: plasma protein surrogates (EpiScores), comparing patients with painful diabetic neuropathy (PDN), painless diabetic neuropathy (PLDN) and healthy controls (CTRL). For each DNAm-based estimate mean values of residuals in the three groups are reported accompanied by corresponding p-values o…
	Subset F	Number of Outliers	Average B-value (Age-adj)			P-value
	DNAm Variable Name		PDN	CTRL	PLDN	PDN vs PLDN	PLDN vs CTRL	PDN vs CTRL
	GHR	0	0.00295323	-0.0018323	-4.23688e-17	0.00333144	0.102961	4.59183e-05
	MMP1	6	0.00216075	-0.00250639	-1.73747e-17	0.00341222	0.00108604	9.66326e-08
	THBS2	2	0.0023265	-0.00505019	2.64879e-18	0.00881694	1.14137e-08	4.22712e-15
	GDF8	1	-0.0015971	0.00384278	-4.79411e-17	0.00977473	2.63396e-12	1.51269e-14
	PAPPA	4	0.00341771	-0.00484162	1.87298e-16	0.0112118	0.000272813	1.21836e-08
	EDA	3	-0.00127267	0.00235071	5.80545e-17	0.016441	2.89555e-07	7.79181e-12
	MPL	3	-0.00196614	0.000258354	-5.63589e-17	0.0211959	0.768442	0.0174929
	CCL21	7	-0.00232713	-5.73671e-05	-5.54027e-17	0.0261277	0.946907	0.020628
	TGF alpha	5	0.00315173	-0.00820855	1.78676e-18	0.0458807	9.22919e-07	1.61411e-09
	GZMA	6	-0.0014631	0.0035088	-4.2871e-17	0.0483804	1.53367e-05	1.23275e-08
	PARC	4	0.0023193	-0.00488986	-2.30585e-17	0.0515244	2.09086e-05	2.31054e-09
	CRP	5	0.00190782	-0.00650552	2.95839e-17	0.0578607	2.14028e-12	6.79145e-15
	NTRK3	3	-0.00292483	-0.00437587	1.50755e-18	0.0580724	0.00521421	0.36962
	Calgranulin B	4	0.00211903	-0.00574837	-4.2707e-18	0.0625645	1.38381e-06	1.78907e-09
	NCAM120	7	-0.00273044	0.00576286	-1.00052e-17	0.0626962	5.90184e-06	7.88529e-09
	C5a	0	0.00312071	-0.00580523	-6.04529e-17	0.06813	0.000966497	9.69982e-06
	GP1BA	3	-0.00226409	-0.00183619	-5.12403e-17	0.0696895	0.126345	0.758654
	Testican2	4	-0.00126383	0.0018052	-3.03182e-17	0.0699884	0.00803275	3.14531e-05
	Endocan	10	-0.00086417	0.000826314	-1.38995e-16	0.0784771	0.0774078	0.00129755
	VEGFA	4	0.00212559	-0.00235287	3.87724e-17	0.0897692	0.0555538	0.000985747
	SHBG	0	0.00199126	0.00104389	-4.2854e-18	0.0956148	0.319075	0.451666
	Lymphotoxin a1b2	0	0.00177771	0.00118756	1.83517e-19	0.0973655	0.244957	0.605715
	Coagulation Factor VII	6	-0.00167533	-0.00137172	1.70685e-18	0.10598	0.18914	0.797477
	EN-RAGE	1	0.00182113	-0.00571323	2.119e-18	0.113742	1.60502e-06	8.09515e-09
	WFKN2	3	-0.00147487	-0.000134353	1.97916e-17	0.130491	0.877732	0.197737
	TrkC	11	-0.00173637	0.0025437	4.42561e-17	0.131474	0.0437985	0.00102913
	IGFBP4	16	0.00136568	-0.00318026	2.17204e-18	0.13252	4.14144e-05	4.22687e-07
	MRC2	5	-0.000731074	0.00197749	-4.79957e-19	0.13847	4.31661e-05	1.89346e-07
	Afamin	6	-0.000632137	9.36821e-05	-1.47262e-18	0.150409	0.83884	0.139681
	TARC	5	0.00286295	-0.0035322	1.75433e-16	0.150857	0.0811177	0.00242803
	SMPD1	20	0.00182567	-0.00211289	7.44645e-18	0.167787	0.104414	0.00682898
	NMNAT1	2	0.00073564	-0.000654027	4.92589e-18	0.178449	0.241286	0.0180394
	DCSIGN	4	-0.00131865	0.00333037	3.76566e-18	0.200132	0.0030463	8.81541e-05
	IGFBP1	2	0.00173856	0.00211635	6.01372e-17	0.205211	0.0723422	0.77976
	HGF	6	0.00135553	-0.00257339	-6.40644e-17	0.209874	0.0205725	0.0018358
	NCDase	5	-0.00671402	0.00426875	1.23281e-17	0.216423	0.447098	0.0757238
	Adiponectin	0	0.00131478	0.00171848	-1.03824e-17	0.226576	0.0480001	0.720263
	EZR	2	-0.000872238	0.0033741	2.49741e-18	0.238667	1.26954e-06	6.53129e-08
	SLIK5	8	-0.00203979	0.00283883	-4.57969e-17	0.2614	0.120442	0.0201438
	SCGFbeta	12	-0.00187852	-0.00722582	6.33792e-17	0.26321	2.7627e-05	0.0041789
	MMP1	4	0.00204243	-0.00691063	3.09597e-17	0.270684	7.97324e-05	5.02719e-06
	CD5L	6	-0.00106901	2.26974e-05	-7.15863e-18	0.321343	0.982484	0.339426
	CXCL9	8	0.000933588	0.000588896	1.77642e-18	0.323694	0.529499	0.745784
	MMP12	1	0.00195713	-0.00421165	-2.86074e-18	0.324873	0.0178651	0.00374578
	TNF sRII	6	-0.000819143	-0.000485991	3.9666e-17	0.326508	0.532655	0.702198
	sICAM5	4	0.00200546	-0.00286001	-2.25122e-17	0.32985	0.159762	0.0317185
	TECK	3	-0.000612351	-0.000462401	-1.76142e-17	0.340736	0.444691	0.831761
	Heparin cofactor II	13	0.000968431	-0.00017474	5.01444e-19	0.341308	0.844351	0.282725
	IR	2	-0.000570614	0.000309877	1.38778e-17	0.34578	0.615212	0.159576
	C9	2	0.0012653	0.000118508	5.80195e-18	0.352666	0.92386	0.420353
	BCMA	6	0.000663775	-0.000571879	1.41082e-17	0.357133	0.378022	0.110823
	Resistin	2	0.00085112	-0.00380068	5.30934e-17	0.358621	7.41482e-05	3.36078e-06
	Notch1	12	-0.00050024	0.00266038	-5.60032e-17	0.365075	3.70536e-07	8.29867e-08
	LY9	4	-0.00165394	0.00429002	2.73822e-17	0.365279	0.0197563	0.0031106
	ENPP7	0	-0.00775858	-0.0132964	-2.97673e-18	0.370254	0.162368	0.580526
	MSP	0	-0.0106307	-0.0202153	2.56604e-17	0.389729	0.107476	0.485451
	OSM	0	0.00124288	-0.00325846	-1.21431e-17	0.421361	0.0276807	0.0067176
	IP10	5	-0.00128506	-0.0010204	-2.1619e-16	0.422301	0.485844	0.875644
	Myeloperoxidase	4	0.000494086	-0.00180776	-7.15258e-19	0.432628	0.00536787	0.000654789
	OMD	6	-0.0012231	0.00247881	4.16334e-17	0.445473	0.0947094	0.0261875
	MDC	27	-0.000310098	-0.000217482	-4.90739e-18	0.468849	0.523527	0.815122
	MMP9	17	0.00118292	-0.00525365	1.24683e-16	0.478676	0.0020161	0.000359358
	sLSelectin	8	-0.000986625	0.00232853	-3.65255e-17	0.481562	0.0849073	0.0156596
	ITAC	6	0.000751876	0.000796615	-1.22391e-17	0.495096	0.408315	0.968904
	Galectin4	15	0.000476251	-0.00115962	3.7372e-17	0.513453	0.0529552	0.0240606
	CXCL10	5	-0.00101705	0.00250762	-2.96115e-17	0.541151	0.134079	0.0517492
	TIG2	5	0.000542582	-0.00414495	8.07522e-19	0.544876	1.42472e-05	5.78244e-06
	NEP	4	-0.00139547	-0.00373906	4.30004e-19	0.561731	0.0878386	0.340582
	LG3BP	8	-0.000435064	-0.00372563	-7.96504e-20	0.565848	1.06439e-05	0.000111225
	CD23	0	0.00093548	-0.00510282	-5.82425e-17	0.572013	0.00134647	0.000445192
	PIGR	32	-0.00119025	-0.00185853	8.99172e-17	0.576988	0.314652	0.731785
	C4	16	0.000293857	-0.000144112	-2.78636e-18	0.583813	0.808546	0.487518
	BMP1	1	0.000643028	0.00237748	-1.66115e-17	0.593878	0.0485048	0.182019
	sESelectin	2	-0.000590813	-0.00470512	1.87777e-17	0.599682	2.7004e-06	0.000243947
	Trypsin 2	21	-0.000433871	-0.00240263	-4.82255e-17	0.635278	0.00211891	0.019127
	SKR3	10	-0.000661562	-0.00122684	9.73614e-17	0.637749	0.367931	0.714266
	Stanniocalcin1	0	-0.000430975	-0.00390569	2.03074e-17	0.640226	6.45134e-07	0.000489293
	CD6	2	-0.0004794	0.00226059	-2.1395e-17	0.644461	0.0322293	0.0136369
	TPSB2	4	-0.00148085	0.00419365	1.52656e-16	0.648833	0.207913	0.104953
	IL19	3	-0.000397395	-0.00127911	-2.02794e-17	0.688595	0.224426	0.415648
	FcRL2	5	-0.000258625	0.00134996	4.29715e-19	0.694715	0.0246162	0.0174319
	CCL11	12	-0.000352175	0.000661005	1.18855e-18	0.705567	0.413267	0.290394
	HGFA	7	0.000336522	-0.00244086	-1.10595e-16	0.715866	0.0057706	0.00480841
	CRTAM	3	0.000560799	-0.00119297	1.17328e-17	0.737409	0.481298	0.328767
	granzyme A	4	0.000616931	0.00370209	-9.38679e-18	0.744566	0.0760358	0.158037
	VCAM1	4	0.000225392	0.000569511	2.23806e-18	0.747031	0.377869	0.646076
	Contactin4	14	-0.000285933	0.00260888	4.40568e-17	0.747064	0.00154071	0.00118867
	GCSF	0	-0.000376697	-0.00119326	-2.83795e-19	0.76161	0.34786	0.558421
	FGF 21	10	0.00053654	-0.00263007	2.42311e-17	0.763795	0.0883263	0.054474
	Aminoacylase1	3	-0.000602749	-0.00506576	3.24162e-17	0.798212	0.0139038	0.0695724
	CXCL11	3	0.000458675	0.0026418	-2.62056e-17	0.798981	0.133068	0.251161
	SCGFalpha	10	-0.000421107	-0.00995755	-3.79471e-19	0.81945	1.20922e-07	5.97497e-06
	Semaphorin 3E	28	0.000303318	0.0026859	-1.60034e-17	0.84188	0.0489441	0.103693
	Alpha1antichymotrypsin complex	3	0.000250159	0.0025633	9.53451e-18	0.850468	0.04612	0.103603
	Lactoferrin	1	9.31873e-05	-0.00136555	2.84142e-18	0.86502	0.0170996	0.0194359
	CD48	5	0.000220666	0.00127192	-6.11047e-17	0.872426	0.304571	0.453163
	sCD163	8	-0.000237083	0.00268343	9.33185e-17	0.874562	0.0643539	0.0641871
	b2Microglobulin	12	-0.000256135	0.000860839	-1.50998e-17	0.878239	0.57611	0.533299
	Chitotriosidase1	3	0.000142248	-0.00232515	4.71843e-17	0.88004	0.0124911	0.0122634
	MIA	4	-0.000112008	0.00220473	-3.44809e-17	0.885293	0.00237446	0.00590037
	IDUA	4	7.78145e-05	-0.00212286	2.06577e-17	0.907154	0.00267709	0.00281678
	ATS13	43	-9.00907e-05	-0.000544065	6.69583e-18	0.913445	0.506372	0.628834
	SIGLEC1	12	9.45058e-05	-0.00220854	9.17875e-18	0.931973	0.0283953	0.0646646
	Granulysin	3	-6.73879e-05	0.00427313	2.5407e-17	0.970687	0.0177298	0.0310036
	SEPR	3	1.98638e-05	0.0031836	7.28843e-17	0.981937	8.05375e-05	0.000637583
	FCG3B	7	3.32416e-05	0.00202585	1.58884e-16	0.983567	0.170056	0.244872
	BCAM	NA	NA	NA	NA	NA	NA	NA
	MMP2	NA	NA	NA	NA	NA	NA	NA
	Lysozyme	NA	NA	NA	NA	NA	NA	NA
